# Supplementary material for: Endogenous TDP-43 mislocalization in a novel knock-in mouse model reveals DNA repair impairment, inflammation, and neuronal senescence
Source: Springer Nature journal article supplement (doi:10.1186/s40478-025-01962-9), 2025-03-08
Supplement: MOESM1 [file 40478_2025_1962_MOESM1_ESM.pdf]

# Supplemental Materials

## **Endogenous TDP-43 mislocalization in a novel knock-in mouse model reveals DNA repair impairment, inflammation, and neuronal senescence**

**Joy Mitra<sup>1\*</sup>, Manohar Kodavati<sup>1</sup>, Prakash Dharmalingam<sup>1</sup>, Erika N. Guerrero<sup>1,†</sup>, K. S. Rao<sup>2</sup>, Ralph M. Garruto<sup>3,4</sup>, Muralidhar L. Hegde<sup>1,5,\*</sup>**

<sup>1</sup> Division of DNA Repair Research, Center for Neuroregeneration, Department of Neurosurgery, Houston Methodist Research Institute, Houston, TX 77030, USA

<sup>2</sup> Department of Biotechnology, Koneru Lakshmaiah Education Foundation Deemed to be University, Green Fields, Vaddeswaram, Andhra Pradesh 522502, India

<sup>3</sup> Department of Anthropology, Binghamton University, State University of New York, Binghamton, NY 13902, USA

<sup>4</sup> Department of Biological Sciences, Binghamton University, State University of New York, Binghamton, NY 13902, USA

<sup>5</sup> Department of Neuroscience, Weill Cornell Medical College, New York, NY 10065, USA

\*Corresponding authors: J.M. ([jmitra@houstonmethodist.org](mailto:jmitra@houstonmethodist.org)) and M.L.H. ([mlhegde@houstonmethodist.org](mailto:mlhegde@houstonmethodist.org))

Present affiliations: † Gorgas Memorial Institute for Health Studies, Avenida Justo Arosemena y Calle 35, Panama City, Republic of Panama & Sistema Nacional de Investigación, SENACYT, Panama City, Republic of Panama

Supplemental materials include one table and its related references, and five figures along with figure legends.

**Supplemental Table 1:** A comparison of TDP-43 pathologies, disease phenotypes and practical applications of various types of TDP-43 mouse models of ALS and FTD.

| Model Type          | TDP-43 variant              | Disease Phenotypes                                                                                                                              | Advantages                                                                                                                                                                                                                                                                                                                                                                                                                                                                                                                                                                                                                                                                     | Disadvantages                                                                                                                                                                                                                                                                                                                                                                                                                                                         | Reference   |
|---------------------|-----------------------------|-------------------------------------------------------------------------------------------------------------------------------------------------|--------------------------------------------------------------------------------------------------------------------------------------------------------------------------------------------------------------------------------------------------------------------------------------------------------------------------------------------------------------------------------------------------------------------------------------------------------------------------------------------------------------------------------------------------------------------------------------------------------------------------------------------------------------------------------|-----------------------------------------------------------------------------------------------------------------------------------------------------------------------------------------------------------------------------------------------------------------------------------------------------------------------------------------------------------------------------------------------------------------------------------------------------------------------|-------------|
| Cisgenic – Knock-in | Tdp-43 $\Delta$ E2/3        | Spinal motor neuron-specific Tdp-43 $\Delta$ E2/3 nuclear depletion-linked ALS-like phenotypes                                                  | <ul style="list-style-type: none"> <li>- Allows to study motor neuron-specific Tdp-43 pathologies and motor defects.</li> <li>- Tdp-43 pathology-induced astrogliosis.</li> </ul>                                                                                                                                                                                                                                                                                                                                                                                                                                                                                              | <ul style="list-style-type: none"> <li>- Not suitable for studying ALS/FTD-TDP-43 related RNA processing and misfolded protein clearance mechanisms.</li> <li>- Possesses disease-irrelevant Tdp-43 mutation.</li> <li>- Pathological effect of Tdp-43<math>\Delta</math>E2/3 variant in the motor cortex is unknown.</li> <li>- Not suitable for studying long-term age-associated ALS phenotypes.</li> </ul>                                                        | [1]         |
| Transgenic          | rNLS (hTDP-43 $\Delta$ NLS) | Insoluble phosphorylated cytoplasmic TDP-43 aggregates in the CNS, brain and muscle atrophy, leading to death.                                  | <ul style="list-style-type: none"> <li>- Allows rapid onset ALS pathology.</li> <li>- Presents most ALS-like symptoms upon hTDP-43<math>\Delta</math>NLS induction.</li> <li>- Presents aggressive but reversible motor deficits.</li> </ul>                                                                                                                                                                                                                                                                                                                                                                                                                                   | <ul style="list-style-type: none"> <li>- hTDP-43<math>\Delta</math>NLS-mediated nuclear loss of wildtype murine Tdp-43.</li> <li>- Non-specific interaction between hTDP-43<math>\Delta</math>NLS and murine mRNA, resulting in aberrant alternative splicing.</li> <li>- Aggressive model of ALS, not suitable for pre-symptomatic biomarker discovery for early detection.</li> <li>- The underlying mechanism of reversible motor phenotype is unclear.</li> </ul> | [2]         |
| Cisgenic – Knock-in | Mnx1-Tdp-43 $\Delta$ NLS    | Nuclear clearance and cytoplasmic-aggregation of Tdp-43 $\Delta$ NLS in motor neurons and associated ALS-type motor defects and muscle weakness | <ul style="list-style-type: none"> <li>- Suitable for investigating progressive motor neuron degeneration mimicking ALS.</li> <li>- Allows cell type-specific and conditional expression of Tdp-43<math>\Delta</math>NLS mutant, with otherwise intact RRM domains.</li> <li>- Suitable for pre-symptomatic pathomechanistic discoveries and biomarker development.</li> <li>- Suitable for studying the gradual nuclear loss of Tdp-43<math>\Delta</math>NLS and altered mRNA processing and expression.</li> <li>- Suitable for investigating Tdp-43 pathology-linked genome instability, inflammation, and neuronal senescence pathways for therapy development.</li> </ul> | <ul style="list-style-type: none"> <li>- Disease onset and manifestation are slow (10-12 months).</li> <li>- Not suitable for aggressive ALS pathology studies.</li> </ul>                                                                                                                                                                                                                                                                                            | This study. |

|                     |               |                                                                                                                                                 |                                                                                                                                                                                                                                                                                                               |                                                                                                                                                                                                                                                                                                                                                                                          |     |
|---------------------|---------------|-------------------------------------------------------------------------------------------------------------------------------------------------|---------------------------------------------------------------------------------------------------------------------------------------------------------------------------------------------------------------------------------------------------------------------------------------------------------------|------------------------------------------------------------------------------------------------------------------------------------------------------------------------------------------------------------------------------------------------------------------------------------------------------------------------------------------------------------------------------------------|-----|
| Transgenic          | hTDP-43 WT    | hTDP-43 overexpression-induced TDP-43 ubiquitination, phosphorylation and fragmentation pathologies. Moderate to aggressive ALS/FTD phenotypes. | -Allows CNS-targeted TDP-43 WT overexpression-associated disease phenotypes.                                                                                                                                                                                                                                  | - Not suitable for examining motor neuron-specific TDP-43 proteinopathies.<br>- Disease onset and aggressiveness vary widely from mild to severe across the transgenic subtypes.<br>-Not reliable for ALS/FTD-TDP-43-linked RNA alternative splicing and biomarker discovery studies.                                                                                                    | [3] |
| Cisgenic – knock-in | Tdp-43 Q331K  | Sporadic ALS-Tdp-43 Q331K variant-induced Tdp-43 gain-of-function phenotypes.                                                                   | - Suitable for studying genetic causes of male dominance in ALS/FTD.<br>- Allows investigating Tdp-43 Q331K-related aberrant mRNA splicing.<br>- Enables investigating Tdp-43 gain-of-function motor and behavioral phenotypes for Q331K mutant.<br>- Allows investigating Tdp-43 pathology-induced metabolic | - Not suitable for investigating TDP-43 loss-of-function and gain-of-toxicity phenotypes.<br>- A rare mutation model.<br>- Lacks ALS-like limb muscle pathologies.                                                                                                                                                                                                                       | [4] |
| Transgenic          | hTDP-43 A315T | TDP-43-mediated neurodegeneration in the brain and spinal cord without cytosolic aggregation of TDP-43                                          | Allows studying<br>- ALS-like motor and pathological phenotypes in a short span of time.<br>- hTDP-43 overexpression-induced disease mechanism in mice.                                                                                                                                                       | - Non-specific TDP-43 pathology for motor neurons and motor cortex.<br>- High levels (3-fold) of Tg-TDP-43 overexpression.<br>- Early onset (1-2 months age) pathological symptoms resembling advanced stages of ALS/FTD.<br>- Possibility of aberrant interactions between Tg-TDP-43 A315T and endogenous mRNA and Tdp-43.<br>- Does not recapitulate human ALS aggregation phenotypes. | [5] |

ALS: amyotrophic lateral sclerosis; FTD: frontotemporal dementia; E2/3: Exon 2 and Exon 3; NLS: nuclear localization signal; CNS: central nervous system; Tg: transgenic.

## Reference

1. Wu LS, Cheng WC, Shen CK (2012) Targeted depletion of TDP-43 expression in the spinal cord motor neurons leads to the development of amyotrophic lateral sclerosis-like phenotypes in mice. *J Biol Chem* 287:27335-27344. <https://10.1074/jbc.M112.359000>
2. Walker AK, Spiller KJ, Ge G, Zheng A, Xu Y, Zhou M, Tripathy K, Kwong LK, Trojanowski JQ, Lee VM (2015) Functional recovery in new mouse models of ALS/FTLD after clearance of pathological cytoplasmic TDP-43. *Acta Neuropathol* 130:643-660. <https://10.1007/s00401-015-1460-x>

3. Wils H, Kleinberger G, Janssens J, Pereson S, Joris G, Cuijt I, Smits V, Ceuterick-de Groote C, Van Broeckhoven C, Kumar-Singh S (2010) TDP-43 transgenic mice develop spastic paralysis and neuronal inclusions characteristic of ALS and frontotemporal lobar degeneration. *Proc Natl Acad Sci U S A* 107:3858-3863. <https://10.1073/pnas.0912417107>
4. White MA, Kim E, Duffy A, Adalbert R, Phillips BU, Peters OM, Stephenson J, Yang S, Massenzio F, Lin Z *et al* (2018) TDP-43 gains function due to perturbed autoregulation in a Tardbp knock-in mouse model of ALS-FTD. *Nat Neurosci* 21:552-563. <https://10.1038/s41593-018-0113-5>
5. Wgorzewska I, Bell S, Cairns NJ, Miller TM, Baloh RH (2009) TDP-43 mutant transgenic mice develop features of ALS and frontotemporal lobar degeneration. *Proc Natl Acad Sci U S A* 106:18809-18814. <https://10.1073/pnas.0908767106>

## Supplemental Fig. 1

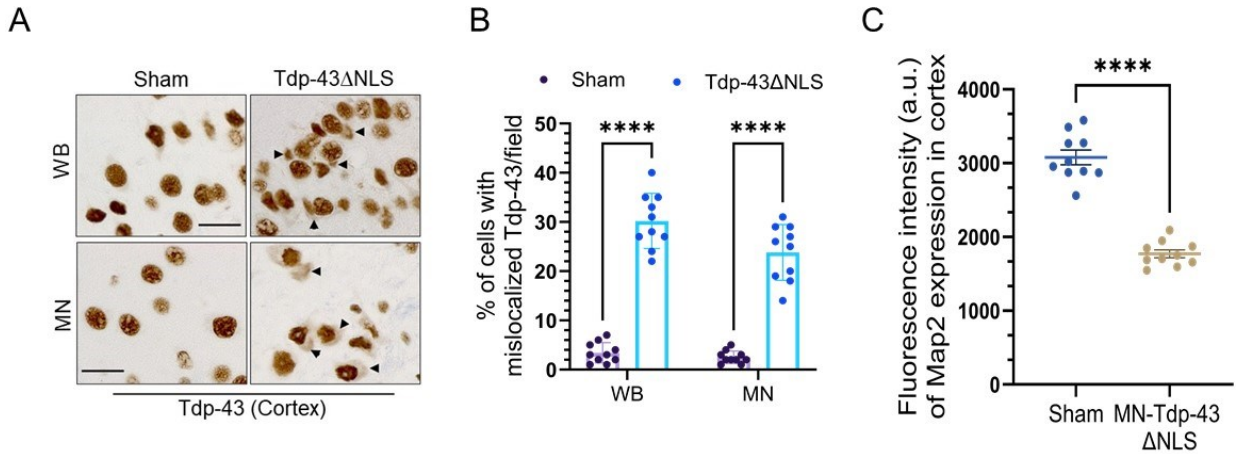

**Supplemental Fig. 1.** (Related to **Fig. 3**) **Immunohistochemical analysis of Tdp-43 expression phenotypes in different Tdp-43 $\Delta$ NLS mice models.** **(A-B)** Immunohistochemistry (IHC) with anti-TDP-43 antibody in the motor cortex of ALS mice Ubc-Cre::Tdp-43 $\Delta$ NLS [whole body (WB)-Tdp-43 $\Delta$ NLS hence after; *upper panel*] and Mnx1-Cre::Tdp-43 $\Delta$ NLS [motor neuron (MN)-Tdp-43 $\Delta$ NLS hence after; *lower panel*]. Scale bar = 20  $\mu$ m **(A)**. **(B)** Quantitation of cells with Tdp-43 mislocalization phenotype in sham versus WB- or MN-Tdp-43 $\Delta$ NLS mice cortical tissues (N = 6 mice/group) by two-way ANOVA. \*\*\*\*,  $P < 0.0001$ . **(C)** Quantitation of fluorescence intensity (arbitrary unit, a.u.) of Map2 levels in Layers III-IV of the cortex of sham and MN-Tdp-43 $\Delta$ NLS mice. Data are expressed as mean  $\pm$  SEM and analyzed by t-test. \*\*\*\*,  $P < 0.0001$ .

## Supplemental Fig. 2

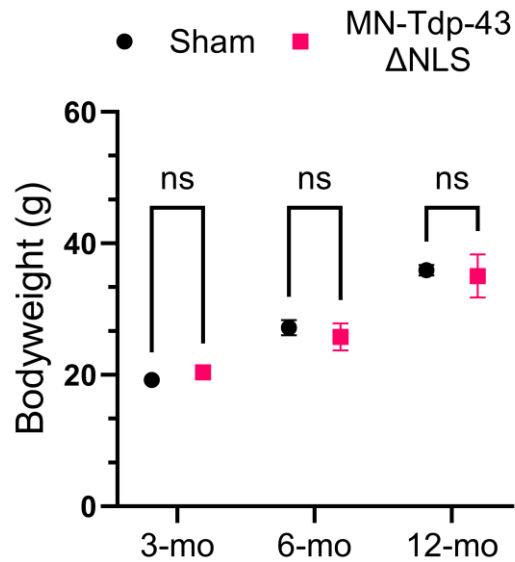

**Supplemental Fig. 2. Assessment of bodyweight at different developmental stages.** Quantitation of bodyweight of *Mnx1-Cre::Tdp-43 $\Delta$ NLS* (MN-Tdp-43 $\Delta$ NLS) mice. Data are expressed as mean  $\pm$  SEM and analyzed by two-way ANOVA. N = 6 per group. ns = non-significant.

## Supplemental Fig. 3

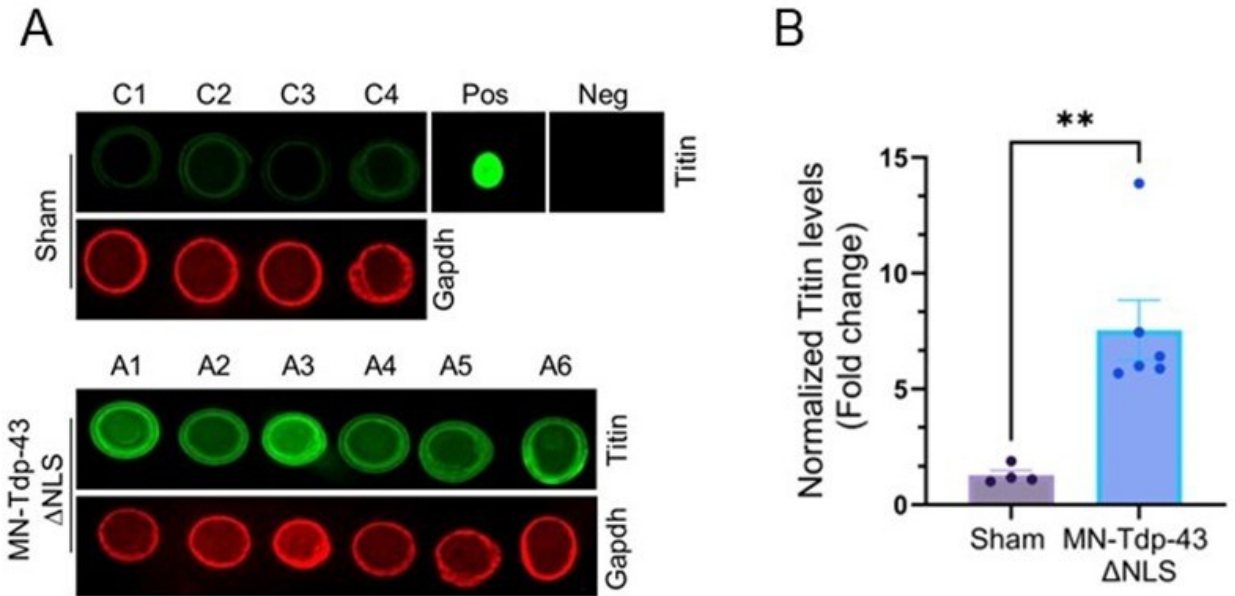

**Supplemental Fig. 3 (Related to Fig. 5). Motor neuron (MN)-specific Tdp-43 $\Delta$ NLS expression causes muscle atrophy and gait deficits in Tdp-43 mutant mice. (A-B)** Dot blot analysis of Titin (N-terminal fragment) in soleus muscle tissues of MN-Tdp-43 $\Delta$ NLS (N = 6; A1 – A6) and sham (N = 4; C1 – C4) mice. Gapdh levels were used as the loading controls. Anti-Titin antibody was used as the Positive (Pos) control and lysis buffer as the Negative control (Neg) (**A**). (**B**) Quantitation of normalized mouse Titin levels in two groups. Data are expressed as mean  $\pm$  SD and analyzed by multiple t-tests. \*\*,  $P < 0.01$ .

## Supplemental Fig. 4

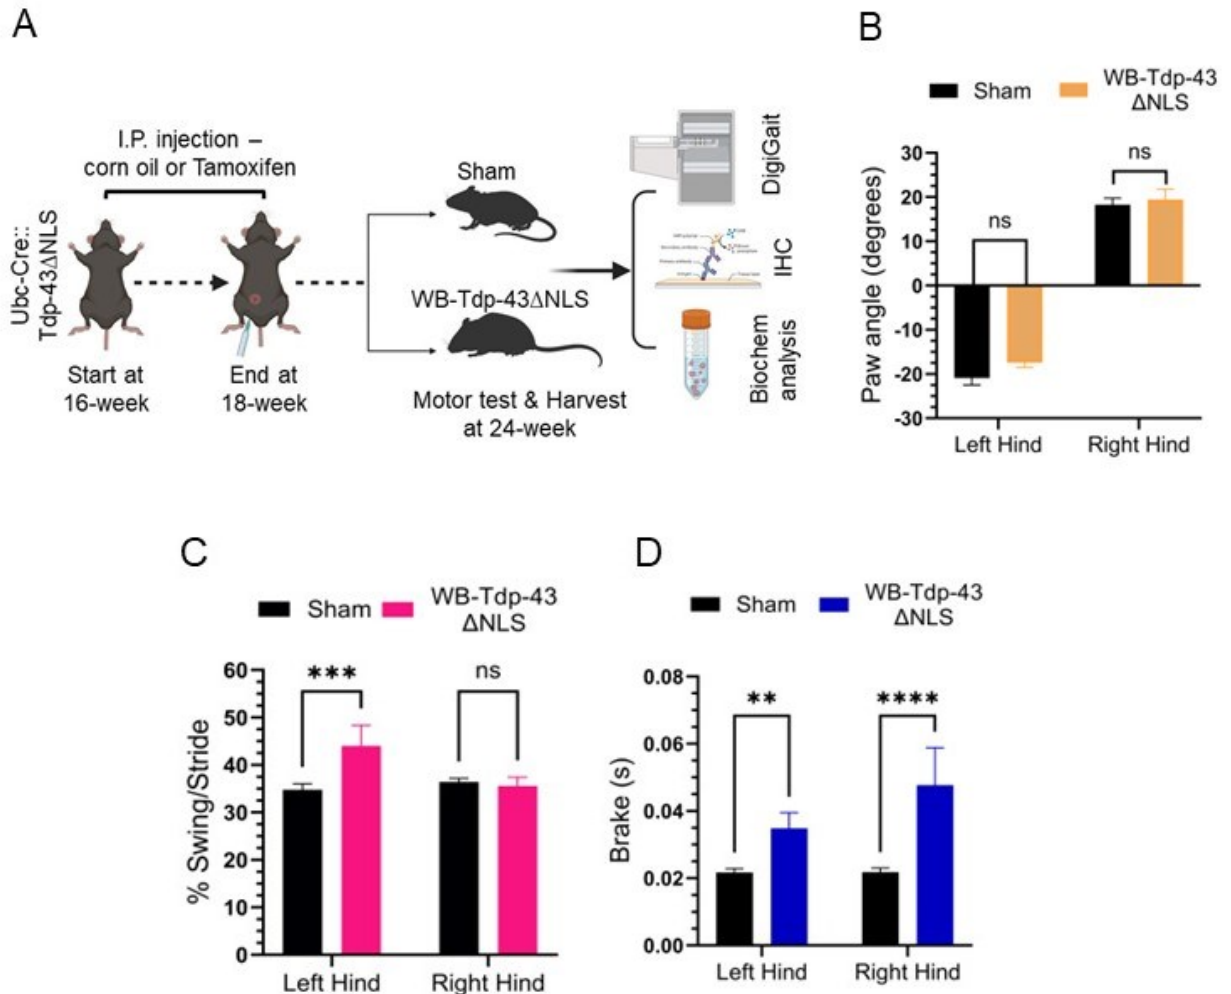

**Supplemental Fig. 4 (Related to Fig. 5). Motor function analysis in whole body (WB) Tdp-43 $\Delta$ NLS expressing mice. (A-D) Schematic illustration of vehicle (corn oil) in sham or tamoxifen treatment in WB-Tdp-43 $\Delta$ NLS male mice by intraperitoneal (i.p.) administration at 16-week age at a dose of 75 mg/kg every other day for two consecutive weeks (18 weeks), and analysis of motor function at 24-week and harvest for histopathological and biochemical analyses (A). DigiGait analysis of paw angle (degrees) (B), percent (%) swing/stride (C), and brake duration (sec) (D). Data are expressed as mean  $\pm$  SD and analyzed by two-way ANOVA. N = 6 per group. ns = non-significant; \*\*,  $P < 0.01$ ; \*\*\*,  $P < 0.001$ ; \*\*\*\*,  $P < 0.0001$ .**



## Supplemental Fig. 5

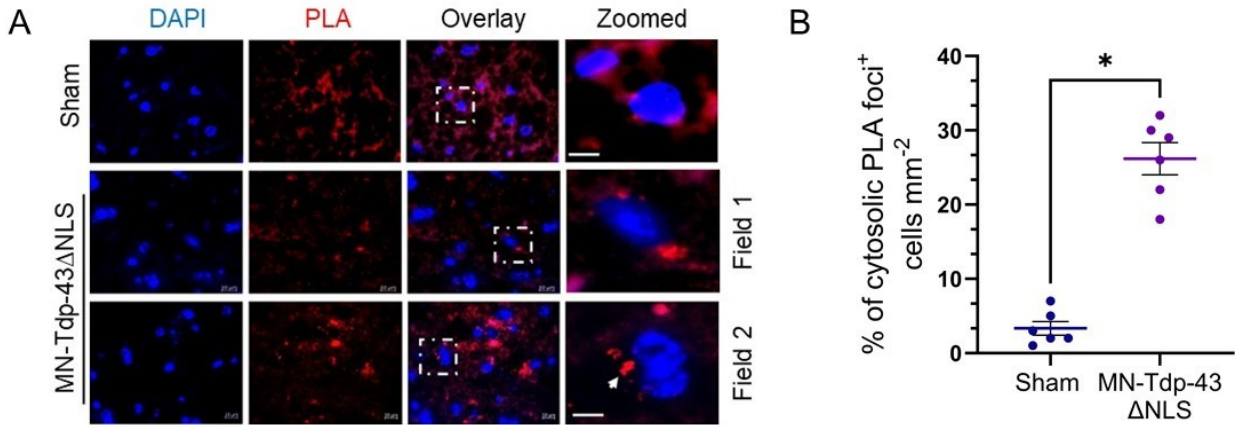

**Supplemental Fig. 5** (Related to Fig. 7). **MN-Tdp-43 $\Delta$ NLS mice present the cytosolic sequestration of DNA ligase 4 by Tdp-43 $\Delta$ NLS.** (A-B) Proximity ligation assay (PLA) exhibiting pathological trapping of murine endogenous DNA ligase 4 by the cytosolic Tdp-43 $\Delta$ NLS in the spinal cord tissue specimens (Fields 1 & 2), as shown by white arrowheads, compared to sham controls. Nuclei were counterstained with DAPI (A). Scale bars = 10  $\mu$ m. (B) Quantitation of percent of cells with cytosolic PLA foci positivity per mm<sup>2</sup> of microscopic area. Data are expressed as mean  $\pm$  SEM and analyzed by Wilcoxon's t-test. \*,  $P < 0.05$ .
